# Supplementary material for: The Pro-Apoptotic BH3-Only Protein Bim Interacts with Components of the Translocase of the Outer Mitochondrial Membrane (TOM)
Source: PLoS One. 2015 Apr 15;10(4):e0123341. doi: 10.1371/journal.pone.0123341 (PMC4398440; doi:10.1371/journal.pone.0123341)
Supplement: S1 Dataset — (XLSX) [file pone.0123341.s005.xlsx]

## Sheet: Sheet1
S1 Dataset	1	2	5	Time (min)
WT	65.33	73.4	100
tom20Δ	58.21	67.77	73.77
WT	58.07	79.09	100
tom20Δ	59.66	74.36	95.11
WT	64.74	74.31	100
tom20Δ	64.26	77.64	124.95
Average
WT	62.7133	75.6	100
tom20Δ	60.71	73.2567	97.9433
WT + SEM	2.33067	1.76675	0
tom20Δ+SEM	1.82585	2.90558	14.8598
	1	2	5	Time (min)
WT - Trypsin	61.33	76.88	100
WT + Trypsin	52.52	61.93	72.52
WT - Trypsin	62.43	89.12	100
WT + Trypsin	39.37	39.31	41.97
WT - Trypsin	54.12	83.57	100
WT + Trypsin	44.6	52.71	67.21
Average
WT - Trypsin	59.2933	83.19	100
WT + Trypsin	45.4967	51.3167	60.5667
WT - Trypsin + SEM	2.60917	3.54268	0
WT + Trypsin + SEM	3.82699	6.57467	9.43501
